# Supplementary material for: Modification of block copolymer vesicles: what will happen when AB diblock copolymer is block-extended to an ABC triblock terpolymer?
Source: Royal Society of Chemistry journal article supplement (doi:10.1039/c5py00208g), 2015-01-01
Supplement: c5py00208g1.pdf [file c5py00208g1.pdf]

## Supporting Information for

### Modification of block copolymer vesicles: What will happen when AB diblock copolymer is block-extended to ABC triblock terpolymer?

Xiaoyan Shen,<sup>a</sup> Fei Huo,<sup>b</sup> Haijiao Kang,<sup>a</sup> Shifeng Zhang,<sup>a,\*</sup> Jianzhang Li,<sup>a,\*</sup> and Wangqing Zhang<sup>b,\*</sup>

<sup>a</sup> MOE Key Laboratory of Wooden Material Science and Application, Beijing Forestry University, Beijing 100083, China; <sup>b</sup> Key Laboratory of Functional Polymer Materials of the Ministry of Education, Collaborative Innovation Center of Chemical Science and Engineering (Tianjin), Institute of Polymer Chemistry, Nankai University, Tianjin 300071, China.

**Table S1.** Experimental details and summary of the synthesized polymers.

| Polymer                                                                         | $[M]_0/[CTA]_0$<br>: $[I]_0$ | Time<br>(h) | Conv.<br>(%) <sup>a</sup> | $M_n$ (kg/mol)          |                          |                          | PDI <sup>e</sup> |
|---------------------------------------------------------------------------------|------------------------------|-------------|---------------------------|-------------------------|--------------------------|--------------------------|------------------|
|                                                                                 |                              |             |                           | $M_{n,th}$ <sup>b</sup> | $M_{n,GPC}$ <sup>c</sup> | $M_{n,NMR}$ <sup>d</sup> |                  |
| PEG <sub>45</sub> - <i>b</i> -PS <sub>278</sub>                                 | 900:3:1                      | 24          | 92.7                      | 31.3                    | 24.3                     | 33.7                     | 1.07             |
| PEG <sub>45</sub> - <i>b</i> -PS <sub>278</sub> - <i>b</i> -P4VP <sub>33</sub>  | 450:3:1                      | 2           | 22.2                      | 34.8                    | 25.6                     | 37.1                     | 1.12             |
| PEG <sub>45</sub> - <i>b</i> -PS <sub>278</sub> - <i>b</i> -P4VP <sub>63</sub>  | 450:3:1                      | 5           | 42.0                      | 37.9                    | 26.8                     | 41.4                     | 1.12             |
| PEG <sub>45</sub> - <i>b</i> -PS <sub>278</sub> - <i>b</i> -P4VP <sub>81</sub>  | 450:3:1                      | 6           | 54.3                      | 39.8                    | 27.8                     | 42.8                     | 1.20             |
| PEG <sub>45</sub> - <i>b</i> -PS <sub>278</sub> - <i>b</i> -P4VP <sub>98</sub>  | 450:3:1                      | 7           | 65.2                      | 41.6                    | 29.4                     | 44.8                     | 1.17             |
| PEG <sub>45</sub> - <i>b</i> -PS <sub>278</sub> - <i>b</i> -P4VP <sub>105</sub> | 450:3:1                      | 8           | 70.3                      | 42.3                    | 30.3                     | 46.3                     | 1.18             |
| PEG <sub>45</sub> - <i>b</i> -PS <sub>278</sub> - <i>b</i> -P4VP <sub>121</sub> | 450:3:1                      | 12          | 80.6                      | 44.0                    | 31.2                     | 47.6                     | 1.19             |
| PEG <sub>45</sub> - <i>b</i> -PS <sub>278</sub> - <i>b</i> -P4VP <sub>131</sub> | 450:3:1                      | 14          | 87.2                      | 45.1                    | 33.3                     | 48.0                     | 1.24             |
| PEG <sub>45</sub> - <i>b</i> -PS <sub>278</sub> - <i>b</i> -P4VP <sub>137</sub> | 450:3:1                      | 20          | 91.1                      | 45.7                    | 33.3                     | 48.7                     | 1.24             |

<sup>a</sup> The monomer conversion determined by <sup>1</sup>H NMR analysis. <sup>b</sup> Theoretical molecular weight determined by monomer conversion. <sup>c</sup> The molecular weight determined by GPC analysis. <sup>d</sup> The molecular weight determined by <sup>1</sup>H NMR analysis. <sup>e</sup> The PDI ( $M_w/M_n$ ) value determined by GPC analysis.

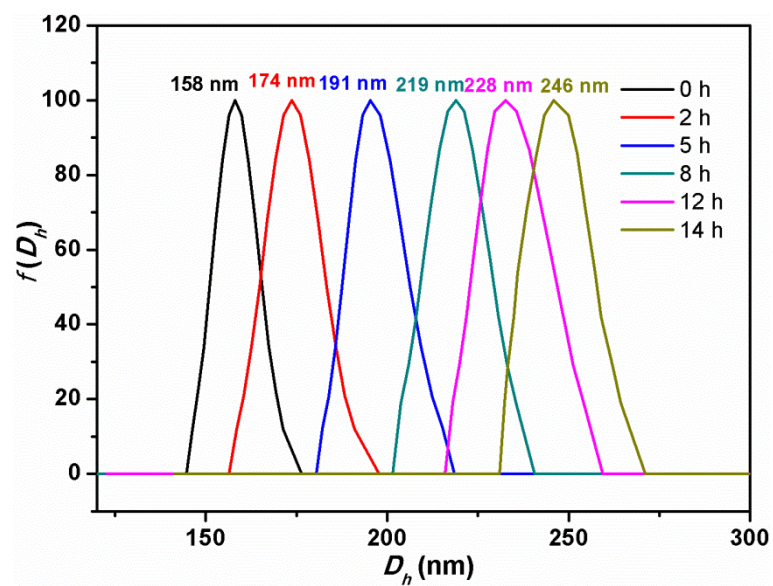

**Figure S1.** Hydrodynamic diameter ( $D_h$ ) distribution of the PEG<sub>45</sub>-*b*-PS<sub>278</sub>-TTC vesicles (0 h) and the PEG<sub>45</sub>-*b*-PS<sub>278</sub>-*b*-P4VP membrane-compartmentalized vesicles dispersed in the 80/20 methanol/water mixture at different polymerization time.
